# Supplementary material for: Rapid Quantification and Quantitation of Alkaloids in Xinjiang Fritillaria by Ultra Performance Liquid Chromatography-Quadrupole Time-of-Flight Mass Spectrometry
Source: PubMed Central journal article supplement (PMC6154541; doi:10.3390/molecules22050719), 2017-05-01
Supplement: molecules-22-00719-s001.pdf [file molecules-22-00719-s001.pdf]

**Table S1** Regression equation, LODs and LOQs of quantitative method for four alkaloid

| compound                             | linear<br>range(ng/mL) | regression equation  | R      | LODs(ng/mL) | LOQs(ng/mL) |
|--------------------------------------|------------------------|----------------------|--------|-------------|-------------|
| Sipeimine-<br>3 $\beta$ -D-glucoside | 7.867~4028             | Y = 181.8X + 4129.5  | 0.9994 | 0.1229      | 0.2458      |
| Sipeimine                            | 1.982~1015             | Y = 375.08X + 4374.8 | 0.9991 | 0.2478      | 0.4956      |
| Peimisine                            | 4.320~2212             | Y = 329.69X + 6301.7 | 0.9993 | 0.1350      | 0.5400      |
| Yibeinoside A                        | 7.969~4080             | Y = 147.32X + 304.87 | 0.9998 | 0.06226     | 0.2490      |

**Table S2** The results of precision, stability and repetition experiment

| Compound                             | Precision degree (n=6) |        | Repeatability (n=6) |        | Stability (n=5) |        |
|--------------------------------------|------------------------|--------|---------------------|--------|-----------------|--------|
|                                      | content(%)             | RSD(%) | content (%)         | RSD(%) | content (%)     | RSD(%) |
| Sipeimine-<br>3 $\beta$ -D-glucoside | 0.0338                 | 4.89   | 0.0316              | 6.53   | 0.0328          | 6.28   |
| Sipeimine                            | 0.0509                 | 1.26   | 0.0475              | 5.26   | 0.0501          | 3.05   |
| Peimisine                            | 0.0098                 | 1.37   | 0.0095              | 5.14   | 0.0100          | 2.09   |
| Yibeinoside A                        | 0.0176                 | 2.386  | 0.0169              | 6.95   | 0.0181          | 2.63   |

**Table S3** The results of recovery experiments

| Component                            | Original<br>( $\mu$ g) | Added<br>( $\mu$ g) | Measured<br>( $\mu$ g) | Recovery<br>(%) | Average recovery<br>(%) | RSD<br>(%) |
|--------------------------------------|------------------------|---------------------|------------------------|-----------------|-------------------------|------------|
| Sipeimine-<br>3 $\beta$ -D-glucoside |                        | 25.16               | 67.04                  | 103.70          |                         |            |
|                                      | 40.95                  | 40.28               | 81.99                  | 101.89          | 101.8                   | 1.95       |
|                                      |                        | 55.38               | 96.18                  | 99.73           |                         |            |
| Sipeimine                            |                        | 35.52               | 95.60                  | 97.35           |                         |            |
|                                      | 61.02                  | 60.90               | 125.58                 | 106.01          | 103.5                   | 5.15       |
|                                      |                        | 86.28               | 153.39                 | 107.06          |                         |            |
| Peimisine                            |                        | 8.30                | 19.90                  | 103.37          |                         |            |
|                                      | 11.32                  | 11.06               | 22.48                  | 100.90          | 100.7                   | 2.82       |
|                                      |                        | 16.59               | 27.53                  | 97.71           |                         |            |
| Yibeinoside A                        |                        | 15.30               | 37.80                  | 100.59          |                         |            |
|                                      | 22.41                  | 20.40               | 42.78                  | 99.85           | 99.80                   | 0.82       |
|                                      |                        | 30.60               | 52.69                  | 98.95           |                         |            |
